# Supplementary material
Source: PubMed Central journal article supplement (PMC6353006)
Supplement: rccm.201804-0678OC_zinter_data_supplement.pdf [file rccm.201804-0678OC_zinter_data_supplement.pdf]

Title: **Early Plasma Matrix Metalloproteinase Profiles: A Novel Pathway in Pediatric Acute Respiratory Distress Syndrome**

Authors: Matt S Zinter; Kevin L Delucchi; Michele Y. Kong; Benjamin E Orwoll;  
Aaron S Spicer; Michelle J Lim; Mustafa F Alkhouli; Anna E Ratiu; Anne V McKenzie;  
Patrick S McQuillen; Christopher C Dvorak; Carolyn S Calfee; Michael A Matthay;  
Anil Sapru

ONLINE DATA SUPPLEMENT

## SUPPLEMENTAL DATA

### Supplemental Methods

In order to identify potential latent classes in the derivation group, we fit multiple finite mixture models using  $\log_{10}$ -transformed MMP-1, -3, -7, -8, and -9, and TIMP-1 and -2 measurements, selected the best-fitting model, and assigned patients to groups based on the estimated probability of latent class membership (Mplus Version 7, Muthen & Muthen). Missing data were handled using the Full Information Maximum Likelihood (FIML) approach, which does not require exclusion of patients with missing data. To satisfy the condition of local independence, MMP-2 and active MMP-9 were excluded as clustering variables due to collinearity with TIMP-2 and total MMP-9, respectively. The optimal number of patient groups was selected using according to the minimal Bayesian Information Criteria, maximal entropy, and the Lo-Mendell-Rubin (LMR) Adjusted Likelihood Ratio Test. To avoid local minima, we used 500 random starts and required that all converge on the same loglikelihood values. The classification fit of the proposed groups was tested by comparing the mean estimated probability of group membership among each proposed group. The latent MMP profile of each group was then described by comparing the mean levels of each MMP pathway biomarker, adjusted for the probability of group membership.

To determine whether latent profile membership could be modeled with linear regression, we fit a linear regression associating the probability of latent profile membership with individual MMP measurements. Least angle regression was used to select the order of addition of MMPs to the model, and the likelihood ratio test was used to limit the size of the model. MMP measurements

from the validation cohort were then entered into the linear regression in order to estimate the probability of group membership in the validation cohort. The validation cohort was then independently separated into latent groups using Mplus, and the assignments from each method were compared.

**SUPPLEMENTAL DATA 1:**

**Relationships Between Individual MMP Measurements and Clinical Characteristics**

**Table E1) Characteristics of Enrolled Patients with vs. without MMP Pathway Measurements**

| <b>Characteristics</b>                         | <b>All patients (n=326)</b> | <b>With MMP Measurements (n=235)</b> | <b>Without MMP Measurements (n=91)</b> | <b>Significance</b> |
|------------------------------------------------|-----------------------------|--------------------------------------|----------------------------------------|---------------------|
| <b>Age</b> (median years, IQR)                 | 4.5 (1.0-11.5)              | 4.1 (1.0-11.5)                       | 4.7 (1.0-11.5)                         | p=0.801             |
| <b>Sex</b> (male n, %)                         | 177 (54.3)                  | 125 (53.2)                           | 52 (57.1)                              | p=0.521             |
| <b>Race</b> (n, %)                             |                             |                                      |                                        | <b>p=0.007</b>      |
| White                                          | 203 (62.3)                  | 160 (68.1)                           | 43 (47.3)                              |                     |
| Unknown                                        | 44 (13.5)                   | 30 (12.8)                            | 14 (15.4)                              |                     |
| Black                                          | 28 (8.6)                    | 17 (7.2)                             | 11 (12.1)                              |                     |
| Asian/PI                                       | 24 (7.4)                    | 15 (6.4)                             | 9 (9.9)                                |                     |
| Multiple                                       | 24 (7.4)                    | 12 (5.1)                             | 12 (13.2)                              |                     |
| American Indian                                | 3 (0.9)                     | 1 (0.4)                              | 2 (2.2)                                |                     |
| <b>Ethnicity</b> (n, %)                        |                             |                                      |                                        | p=0.435             |
| Hispanic/Latino                                | 123 (37.7)                  | 84 (35.7)                            | 39 (42.9)                              |                     |
| Not Hispanic/Latino                            | 188 (57.7)                  | 139 (59.2)                           | 39 (53.9)                              |                     |
| Unknown                                        | 15 (4.6)                    | 12 (5.1)                             | 3 (3.3)                                |                     |
| <b>Lung Injury Etiology</b> (n, %)             |                             |                                      |                                        | p=0.361             |
| Pneumonia                                      | 183 (56.8)                  | 127 (54.5)                           | 56 (62.9)                              |                     |
| Sepsis                                         | 67 (20.8)                   | 49 (21.0)                            | 18 (20.2)                              |                     |
| Other                                          | 37 (11.5)                   | 27 (11.6)                            | 10 (11.2)                              |                     |
| Trauma                                         | 17 (5.3)                    | 13 (5.6)                             | 4 (4.5)                                |                     |
| Aspiration                                     | 13 (4.0)                    | 12 (5.2)                             | 1 (1.1)                                |                     |
| TRALI                                          | 5 (1.6)                     | 5 (2.2)                              | 0 (0.0)                                |                     |
| <b>Cancer/HCT</b> (n, %)                       |                             |                                      |                                        | p=0.491             |
| Cancer                                         | 36 (11.1)                   | 26 (11.2)                            | 10 (11.0)                              |                     |
| HCT                                            | 32 (9.9)                    | 29 (12.6)                            | 3 (3.3)                                |                     |
| Cancer or HCT                                  | 54 (16.6)                   | 41 (17.5)                            | 13 (14.3)                              |                     |
| <b>WBC</b> (median, IQR)                       | 8.2 (4.4-14.3)              | 7.8 (4.3-14)                         | 10.4 (4.8-15.7)                        | p=0.247             |
| <b>Day 1 Illness Severity</b> (median, IQR)    |                             |                                      |                                        |                     |
| PaO <sub>2</sub> /FiO <sub>2</sub> Ratio (P/F) | 128.3 (82.9-210)            | 132 (84.3-220)                       | 121.9 (80.6-194.3)                     | p=0.440             |
| Oxygenation Index (OI)                         | 10.3 (5.9-19.7)             | 10.1 (6.1-19.6)                      | 12.1 (5.6-21.1)                        | p=0.609             |
| PRISM-3                                        | 12 (7-20)                   | 12 (7-20)                            | 12 (8-20)                              | p=0.488             |
| <b>Day 3 Illness Severity</b> (median, IQR)    |                             |                                      |                                        |                     |
| PaO <sub>2</sub> /FiO <sub>2</sub> Ratio (P/F) | 166.5 (107.2-241.4)         | 173.9 (116.1-264.8)                  | 141.7 (100-209.2)                      | <b>p=0.017</b>      |
| Oxygenation Index (OI)                         | 8.2 (4.8-15.3)              | 7.9 (4.5-14.5)                       | 9.8 (5.6-20)                           | p=0.061             |
| PELOD                                          | 11 (1-12)                   | 11 (1-12)                            | 11 (1-12)                              | p=0.905             |

**Legend:** Associations tested with Fisher exact test for categorical variables and Wilcoxon rank sum for non-normally distributed continuous variables. On day 1, P/F ratio n=299; OI n=272; PRISM-3 n=275. On day 3, P/F ratio n=284; OI n=244, PELOD n=326.

**Table E2) Plasma MMP Levels Are Associated with Survivor Morbidity**

| <b>Biomarker (ng/mL)</b>      | <b>Survivor PELOD (n=193)</b> |                   |
|-------------------------------|-------------------------------|-------------------|
| <b>MMP-1</b>                  | 0.291                         | <b>p&lt;0.001</b> |
| <b>MMP-2</b>                  | 0.278                         | <b>p&lt;0.001</b> |
| <b>MMP-3</b>                  | 0.220                         | <b>p=0.004</b>    |
| <b>MMP-7</b>                  | 0.212                         | <b>p=0.007</b>    |
| <b>MMP-8</b>                  | 0.124                         | p=0.120           |
| <b>MMP-9</b>                  | -0.104                        | p=0.179           |
| <b>MMP-9 (active)</b>         | -0.090                        | p=0.262           |
| <b>TIMP-1</b>                 | 0.427                         | <b>p&lt;0.001</b> |
| <b>TIMP-2</b>                 | 0.285                         | <b>p&lt;0.001</b> |
| <b>MMP-9/ TIMP-1</b>          | -0.335                        | <b>p&lt;0.001</b> |
| <b>MMP-9 (active)/ TIMP-1</b> | -0.305                        | <b>p&lt;0.001</b> |

**Legend:** Associations were tested using Spearman’s  $\rho$  with univariate significance.

**Table E3) Plasma MMP Levels Are Associated with Day 1 Illness Severity**

| <b>Biomarker (ng/mL)</b> | <b>Day 1 P/F</b> |                | <b>Day 1 OI</b> |                   | <b>Day 1 PRISM-3</b> |                   |
|--------------------------|------------------|----------------|-----------------|-------------------|----------------------|-------------------|
| <b>MMP-1</b>             | -0.131           | p=0.075        | 0.169           | <b>p=0.029</b>    | 0.222                | <b>p=0.004</b>    |
| <b>MMP-2</b>             | -0.006           | p=0.935        | 0.005           | p=0.948           | 0.167                | <b>p=0.032</b>    |
| <b>MMP-3</b>             | -0.051           | p=0.479        | 0.106           | p=0.162           | 0.350                | <b>p&lt;0.001</b> |
| <b>MMP-7</b>             | -0.121           | p=0.100        | 0.191           | <b>p=0.013</b>    | 0.184                | <b>p=0.018</b>    |
| <b>MMP-8</b>             | -0.147           | <b>p=0.045</b> | 0.208           | <b>p=0.007</b>    | 0.152                | p=0.051           |
| <b>MMP-9</b>             | -0.124           | p=0.087        | 0.067           | p=0.380           | -0.187               | <b>p=0.012</b>    |
| <b>aMMP-9</b>            | -0.027           | p=0.711        | -0.057          | p=0.462           | -0.215               | <b>p=0.005</b>    |
| <b>TIMP-1</b>            | -0.235           | <b>p=0.001</b> | 0.333           | <b>p&lt;0.001</b> | 0.451                | <b>p&lt;0.001</b> |
| <b>TIMP-2</b>            | -0.070           | p=0.340        | 0.091           | p=0.243           | 0.238                | <b>p=0.002</b>    |
| <b>MMP-9 / TIMP-1</b>    | 0.070            | p=0.332        | -0.164          | <b>p=0.030</b>    | -0.413               | <b>p&lt;0.001</b> |
| <b>aMMP-9 / TIMP-1</b>   | 0.200            | <b>p=0.011</b> | -0.283          | <b>p&lt;0.001</b> | -0.438               | <b>p&lt;0.001</b> |

**Legend:** Associations were tested using Spearman’s  $\rho$  with univariate significance.

**Table E4) Plasma MMP Levels Are Associated with Day 3 Illness Severity**

| Biomarker (ng/mL)      | Day 3 P/F |                | Day 3 OI |                | Day 3 PELOD |                   |
|------------------------|-----------|----------------|----------|----------------|-------------|-------------------|
| <b>MMP-1</b>           | -0.073    | p=0.338        | 0.124    | p=0.124        | 0.263       | <b>p&lt;0.001</b> |
| <b>MMP-2</b>           | 0.009     | p=0.902        | 0.004    | p=0.958        | 0.212       | <b>p=0.003</b>    |
| <b>MMP-3</b>           | -0.048    | p=0.515        | 0.034    | p=0.668        | 0.195       | <b>p=0.005</b>    |
| <b>MMP-7</b>           | -0.162    | <b>p=0.032</b> | 0.119    | p=0.139        | 0.273       | <b>p&lt;0.001</b> |
| <b>MMP-8</b>           | -0.048    | p=0.532        | 0.034    | p=0.674        | 0.179       | <b>p=0.012</b>    |
| <b>MMP-9</b>           | 0.058     | p=0.437        | -0.077   | p=0.338        | -0.153      | <b>p=0.028</b>    |
| <b>aMMP-9</b>          | 0.100     | p=0.190        | -0.154   | p=0.057        | -0.148      | <b>p=0.038</b>    |
| <b>TIMP-1</b>          | -0.205    | <b>p=0.005</b> | 0.239    | <b>p=0.003</b> | 0.304       | <b>p&lt;0.001</b> |
| <b>TIMP-2</b>          | -0.060    | p=0.432        | 0.056    | p=0.490        | 0.236       | <b>p&lt;0.001</b> |
| <b>MMP-9/ TIMP-1</b>   | 0.145     | <b>p=0.049</b> | -0.178   | <b>p=0.025</b> | -0.293      | <b>p&lt;0.001</b> |
| <b>aMMP-9 / TIMP-1</b> | 0.186     | <b>p=0.022</b> | -0.236   | <b>p=0.006</b> | -0.275      | <b>p&lt;0.001</b> |

**Legend:** Associations were tested using Spearman’s  $\rho$  with univariate significance.

**Table E5) Plasma MMP Levels Are Associated with Indirect Lung Injury**

| Biomarker (ng/mL)             | Direct Lung Injury (n=140) |                | Indirect Lung Injury (n=93) |                | Significance   | Adjusted Significance |
|-------------------------------|----------------------------|----------------|-----------------------------|----------------|----------------|-----------------------|
| <b>MMP-1</b>                  | 1092.4                     | (606.6-2292.5) | 1196.5                      | (757.9-2677.1) | p=0.197        | p=0.317               |
| <b>MMP-2</b>                  | 487.4                      | (350.6-704.1)  | 492                         | (361.9-727.7)  | p=0.623        | p=0.858               |
| <b>MMP-3</b>                  | 3                          | (1.8-7.2)      | 4.9                         | (2.4-10)       | <b>p=0.014</b> | p=0.130               |
| <b>MMP-7</b>                  | 393.3                      | (157.2-886.4)  | 521.5                       | (230.8-1280.5) | <b>p=0.031</b> | p=0.773               |
| <b>MMP-8</b>                  | 21.5                       | (11.7-48.6)    | 40.3                        | (17.1-89.0)    | <b>p=0.032</b> | p=0.250               |
| <b>MMP-9</b>                  | 104                        | (61-231)       | 119                         | (61-248)       | p=0.501        | p=0.084               |
| <b>MMP-9 (active)</b>         | 232.1                      | (127.1-468.4)  | 202.5                       | (107.5-515)    | p=0.691        | p=0.394               |
| <b>TIMP-1</b>                 | 274.5                      | (139-487)      | 377.5                       | (189-766)      | <b>p=0.018</b> | <b>p=0.042</b>        |
| <b>TIMP-2</b>                 | 77.8                       | (57.9-96.2)    | 81.8                        | (67.9-102.9)   | p=0.234        | p=0.585               |
| <b>MMP-9/ TIMP-1</b>          | 0.44                       | (0.16-1.11)    | 0.34                        | (0.11-0.83)    | p=0.239        | p=0.185               |
| <b>MMP-9 (active)/ TIMP-1</b> | 0.83                       | (0.35-2.14)    | 0.62                        | (0.18-1.38)    | p=0.072        | p=0.352               |

**Legend:** Median and interquartile range of plasma MMP pathway proteins are shown for pediatric ARDS patients with direct (n=140, pneumonia or aspiration) and indirect lung injury (n=93, non-pulmonary sepsis, transfusion related acute lung injury, trauma, and other). Significance was tested using the Wilcoxon rank sum test. Adjusted significance was tested using linear regression for outcome of log<sub>10</sub>-transformed biomarker as predicted by direct vs indirect lung injury status, with adjustment for cancer/HCT status and day 1 P/F ratio.

**Table E6) Plasma MMP Levels Are Associated with Cancer/HCT**

| Biomarker (ng/mL)             | No Cancer/HCT (n=194) |                 | Cancer/HCT (n=41) |                 | Significance      | Adjusted Significance |
|-------------------------------|-----------------------|-----------------|-------------------|-----------------|-------------------|-----------------------|
| <b>MMP-1</b>                  | 1,096.7               | (663.2-2,324.3) | 1,618.1           | (485.9-3,250.2) | p=0.385           | p=0.532               |
| <b>MMP-2</b>                  | 491.3                 | (351.1-711.8)   | 582.6             | (402.2-768.6)   | p=0.287           | p=0.377               |
| <b>MMP-3</b>                  | 3.5                   | (1.9-7.9)       | 3.9               | (2.7-8.8)       | p=0.194           | p=0.458               |
| <b>MMP-7</b>                  | 400.8                 | (173.0-1026.2)  | 791.9             | (304.2-2090.2)  | <b>p=0.007</b>    | <b>p=0.006</b>        |
| <b>MMP-8</b>                  | 31.4                  | (13.3-70.4)     | 28.4              | (8.4-56.1)      | p=0.363           | p=0.373               |
| <b>MMP-9</b>                  | 129.0                 | (66-255)        | 61.0              | (34-111)        | <b>p&lt;0.001</b> | <b>p=0.001</b>        |
| <b>MMP-9 (active)</b>         | 243.9                 | (126.9-510.2)   | 131.6             | (76.9-269.0)    | <b>p&lt;0.001</b> | <b>p&lt;0.001</b>     |
| <b>TIMP-1</b>                 | 272.5                 | (138-483)       | 583.0             | (340-972)       | <b>p&lt;0.001</b> | <b>p&lt;0.001</b>     |
| <b>TIMP-2</b>                 | 78.8                  | (61.0-97.1)     | 83.3              | (68.9-110.7)    | p=0.347           | p=0.558               |
| <b>MMP-9/ TIMP-1</b>          | 0.50                  | (0.18-1.16)     | 0.09              | (0.07-0.16)     | <b>p&lt;0.001</b> | <b>p&lt;0.001</b>     |
| <b>MMP-9 (active)/ TIMP-1</b> | 0.93                  | (0.34-2.27)     | 0.20              | (0.10-0.76)     | <b>p&lt;0.001</b> | <b>p&lt;0.001</b>     |

**Legend:** Median and interquartile range of plasma MMP pathway proteins are shown for pediatric ARDS patients with prior Cancer/HCT (n=41) and without prior cancer/HCT (n=194). Significance was tested using the Wilcoxon rank sum test. Adjusted significance was tested using linear regression for outcome of log<sub>10</sub>-transformed biomarker as predicted by cancer/HCT status, with adjustment for age, sex, race, and WBC.

**Table E7) Plasma MMP Levels Are Associated with WBC**

| Biomarker (ng/mL)             | WBC    |                   |                       |
|-------------------------------|--------|-------------------|-----------------------|
|                               | ρ      | Significance      | Adjusted Significance |
| <b>MMP-1</b>                  | -0.095 | p=0.195           | p=0.472               |
| <b>MMP-2</b>                  | -0.192 | <b>p=0.008</b>    | p=0.181               |
| <b>MMP-3</b>                  | -0.149 | <b>p=0.037</b>    | p=0.797               |
| <b>MMP-7</b>                  | -0.104 | p=0.157           | p=0.566               |
| <b>MMP-8</b>                  | 0.000  | p=0.997           | p=0.091               |
| <b>MMP-9</b>                  | 0.378  | <b>p&lt;0.001</b> | <b>p=0.002</b>        |
| <b>MMP-9 (active)</b>         | 0.431  | <b>p&lt;0.001</b> | <b>p&lt;0.001</b>     |
| <b>TIMP-1</b>                 | -0.304 | <b>p&lt;0.001</b> | p=0.550               |
| <b>TIMP-2</b>                 | -0.151 | <b>p=0.039</b>    | p=0.808               |
| <b>MMP-9/ TIMP-1</b>          | 0.471  | <b>p&lt;0.001</b> | p=0.076               |
| <b>MMP-9 (active)/ TIMP-1</b> | 0.467  | <b>p&lt;0.001</b> | <b>p=0.001</b>        |

**Legend:** Significance was tested using Spearman's ρ associations. Adjusted significance was tested using linear regression for the outcome of log<sub>10</sub>-transformed biomarker as predicted by WBC, with adjustment for age, sex, race, and cancer/HCT status.



## **SUPPLEMENTAL DATA 2**

### **Derivation of Latent Classes**

**Table E8) Characteristics of Derivation vs. Validation Cohorts**

| <b>Characteristics</b>                         | <b>All patients (n=235)</b> | <b>Derivation (n=126)</b> | <b>Validation (n=109)</b> | <b>Significance</b> |
|------------------------------------------------|-----------------------------|---------------------------|---------------------------|---------------------|
| <b>Age</b> (median years, IQR)                 | 4.1 (1.0-11.5)              | 3.6 (1.0-11.4)            | 5.0 (1.1-11.9)            | p=0.508             |
| <b>Sex</b> (male n, %)                         | 125 (53.2)                  | 65 (51.6)                 | 60 (55.1)                 | p=0.596             |
| <b>Race</b> (n, %)                             |                             |                           |                           | <b>p=0.018</b>      |
| White                                          | 160 (68.1)                  | 89 (70.6)                 | 71 (65.1)                 |                     |
| Unknown                                        | 30 (12.8)                   | 13 (10.3)                 | 17 (15.6)                 |                     |
| Black                                          | 17 (7.2)                    | 10 (7.9)                  | 7 (6.4)                   |                     |
| Asian/PI                                       | 15 (6.4)                    | 12 (9.5)                  | 3 (2.8)                   |                     |
| Multiple                                       | 12 (5.1)                    | 2 (1.6)                   | 10 (9.2)                  |                     |
| American Indian                                | 1 (0.4)                     | 0 (0)                     | 1 (0.9)                   |                     |
| <b>Ethnicity</b> (n, %)                        |                             |                           |                           | p=0.387             |
| Hispanic/Latino                                | 84 (35.7)                   | 40 (31.8)                 | 44 (40.4)                 |                     |
| Not Hispanic/Latino                            | 139 (59.2)                  | 79 (62.7)                 | 60 (55.1)                 |                     |
| Unknown                                        | 12 (5.1)                    | 7 (5.6)                   | 5 (4.6)                   |                     |
| <b>Lung Injury Etiology</b> (n, %)             |                             |                           |                           | <b>p=0.016</b>      |
| Pneumonia                                      | 127 (54.5)                  | 72 (58.1)                 | 55 (50.5)                 |                     |
| Sepsis                                         | 49 (21.0)                   | 23 (18.6)                 | 26 (23.9)                 |                     |
| Other                                          | 27 (11.6)                   | 18 (14.5)                 | 9 (8.3)                   |                     |
| Trauma                                         | 13 (5.6)                    | 2 (1.6)                   | 11 (10.1)                 |                     |
| Aspiration                                     | 12 (5.2)                    | 8 (6.5)                   | 4 (3.7)                   |                     |
| TRALI                                          | 5 (2.2)                     | 1 (0.8)                   | 4 (3.7)                   |                     |
| <b>Cancer/HCT</b> (n, %)                       |                             |                           |                           |                     |
| Cancer                                         | 26 (11.2)                   | 16 (12.9)                 | 10 (9.2)                  | p=0.367             |
| HCT                                            | 29 (12.6)                   | 18 (14.4)                 | 11 (10.4)                 | p=0.358             |
| Cancer or HCT                                  | 41 (17.5)                   | 25 (19.8)                 | 16 (14.7)                 | p=0.298             |
| <b>WBC</b> (median, IQR)                       | 7.8 (4.3-14)                | 7.8 (3.7-14.1)            | 7.7 (4.6-13.6)            | p=0.776             |
| <b>Day 1 Illness Severity</b> (median, IQR)    |                             |                           |                           |                     |
| PaO <sub>2</sub> /FiO <sub>2</sub> Ratio (P/F) | 132 (84.3-220)              | 148.8 (91.1-228.3)        | 125.9 (76-205.7)          | p=0.138             |
| Oxygenation Index (OI)                         | 10.1 (6.1-19.6)             | 10.1 (6.1-18.3)           | 9.8 (5.7-21.6)            | p=0.794             |
| PRISM-3                                        | 12 (7-20)                   | 12 (8-20)                 | 12 (5-19)                 | p=0.250             |
| <b>Day 3 Illness Severity</b> (median, IQR)    |                             |                           |                           |                     |
| PaO <sub>2</sub> /FiO <sub>2</sub> Ratio (P/F) | 173.9 (116.1-264.8)         | 173.3 (105.2-266.7)       | 174.5 (118.2-264.5)       | p=0.727             |
| Oxygenation Index (OI)                         | 7.9 (4.5-14.5)              | 8.0 (4.4-14.5)            | 7.0 (4.9-15.2)            | p=0.771             |
| PELOD                                          | 11 (1-12)                   | 21 (11-30)                | 21 (11-30)                | p=0.740             |
| <b>Mortality</b>                               | 42 (17.9)                   | 22 (17.5)                 | 20 (18.4)                 | p=0.859             |
| <b>Mortality or Severe Morbidity</b>           | 81 (34.5)                   | 45 (35.7)                 | 36 (33.0)                 | p=0.666             |

**Legend:** Associations tested with Fisher exact test for categorical variables and Wilcoxon rank sum for non-normally distributed continuous variables. On day 1, P/F ratio n=219; OI n=198; PRISM-3 n=198. On day 3, P/F ratio n=208; OI n=181, PELOD n=235.

**Table E9) MMP Pathway Correlation Matrix**

|        | MMP-1                             | MMP-2                             | MMP-3                             | MMP-7                             | MMP-8                             | MMP-9                             | MMP-9a            | TIMP-1                            | TIMP-2 |
|--------|-----------------------------------|-----------------------------------|-----------------------------------|-----------------------------------|-----------------------------------|-----------------------------------|-------------------|-----------------------------------|--------|
| MMP-1  | 1                                 |                                   |                                   |                                   |                                   |                                   |                   |                                   |        |
| MMP-2  | <b>0.237</b><br><b>p&lt;0.001</b> | 1                                 |                                   |                                   |                                   |                                   |                   |                                   |        |
| MMP-3  | 0.164<br>p=0.053                  | 0.149<br>p=0.144                  | 1                                 |                                   |                                   |                                   |                   |                                   |        |
| MMP-7  | <b>0.199</b><br><b>p=0.001</b>    | 0.150<br>p=0.061                  | <b>0.215</b><br><b>p=0.001</b>    | 1                                 |                                   |                                   |                   |                                   |        |
| MMP-8  | <b>0.214</b><br><b>p&lt;0.001</b> | 0.090<br>p=1.000                  | 0.124<br>p=0.602                  | 0.153<br>p=0.051                  | 1                                 |                                   |                   |                                   |        |
| MMP-9  | 0.042<br>p=1.000                  | -0.017<br>p=1.000                 | -0.025<br>p=1.000                 | -0.079<br>p=1.000                 | <b>0.242</b><br><b>p&lt;0.001</b> | 1                                 |                   |                                   |        |
| MMP-9a | 0.050<br>p=1.000                  | -0.041<br>p=1.000                 | -0.033<br>p=1.000                 | -0.047<br>p=1.000                 | <b>0.260</b><br><b>p&lt;0.001</b> | <b>0.693</b><br><b>p&lt;0.001</b> | 1                 |                                   |        |
| TIMP-1 | <b>0.303</b><br><b>p&lt;0.001</b> | <b>0.216</b><br><b>p=0.001</b>    | <b>0.380</b><br><b>p&lt;0.001</b> | <b>0.274</b><br><b>p&lt;0.001</b> | <b>0.247</b><br><b>p&lt;0.001</b> | -0.068<br>p=1.000                 | -0.097<br>p=1.000 | 1                                 |        |
| TIMP-2 | <b>0.246</b><br><b>p&lt;0.001</b> | <b>0.710</b><br><b>p&lt;0.001</b> | <b>0.212</b><br><b>p=0.001</b>    | <b>0.200</b><br><b>p=0.001</b>    | <b>0.167</b><br><b>p=0.017</b>    | 0.013<br>p=1.000                  | 0.015<br>p=1.000  | <b>0.303</b><br><b>p&lt;0.001</b> | 1      |

**Legend:** Kendall’s rank correlation (tau coefficient) with Bonferroni-adjusted p-values. Bolded black values indicate statistically significant weak correlation (tau <0.4). Bolded red values indicate statistically significant moderate-to-strong correlation (tau ≥0.4).

**PEDIATRIC ARDS DERIVATION COHORT (n=126)**

**Table E10a) MMP Latent Profile Analysis in Pediatric ARDS Derivation Cohort**

| Models            | AIC     | BIC     | ABIC    | k-1 LMR        | Entropy | Profile Size |
|-------------------|---------|---------|---------|----------------|---------|--------------|
| <b>2 profiles</b> | 787.287 | 858.194 | 779.136 | <b>p=0.002</b> | 0.829   | n=41,85      |
| <b>3 profiles</b> | 737.522 | 833.956 | 727.437 | p=0.153        | 0.771   | n=39,39,48   |
| <b>4 profiles</b> | 686.174 | 808.134 | 672.155 | p=0.167        | 0.810   | n=9,32,39,46 |

**Legend:** Akaike, Bayesian, and sample-size adjusted Bayesian Information Criteria (AIC, BIC, ABIC, respectively) are listed for 2, 3, and 4 profile models. Each model was compared to the model with 1 fewer latent profile (k-1) using the Lo-Mendell-Rubin (LMR) Adjusted Likelihood Ratio Test. Profile Size refers to sample size of each Latent Profile according to most likely assignment based on posterior probabilities. Although a 3 class model had a smaller BIC relative to the 2 profile model, it was not significantly different by the LMR test (p=0.153) and had lower entropy and therefore was determined to be overfit and a 2 profile model was selected.

**Table E10b) Average Latent Class Probabilities for Most Likely Latent Class Membership (Row) by Latent Class (Column) in the Derivation Cohort**

|                                                           | <b>Probability of Profile 1</b> | <b>Probability of Profile 2</b> |
|-----------------------------------------------------------|---------------------------------|---------------------------------|
| <b>Patients Most Likely to belong to Profile 1 (n=41)</b> | 94.9%                           | 5.1%                            |
| <b>Patients Most Likely to belong to Profile 2 (n=85)</b> | 5.1%                            | 94.9%                           |

**Legend:** Patients were assigned to latent profiles based on the maximum posterior probability for profile 1 vs. 2 (rows). The mean probability of being in profile 1 vs. profile 2 is listed for patients whose maximum posterior probability grouped them in profile 1 and again for patients whose maximum posterior probability grouped them in profile 2. These data show that misclassification in the 2-profile model was low.

**Table E10c) Incidence and Mortality of Latent Profile 1 vs. 2 in the Derivation Cohort**

|                               | <b>Profile 1</b> | <b>Profile 2</b> | <b>Comparison</b> |
|-------------------------------|------------------|------------------|-------------------|
| <b>Number of Patients</b>     |                  |                  |                   |
| Maximum Posterior Probability | 41 (32.5%)       | 85 (67.5%)       | n/a               |
| Estimated Profile Counts      | 43.3 (34.4%)     | 82.7 (65.6%)     | n/a               |
| <b>Mortality</b>              |                  |                  |                   |
| Maximum Posterior Probability | 11 (26.8%)       | 11 (13.1%)       | p=0.058           |
| Estimated Profile Counts      | 11.6 (26.7%)     | 10.5 (12.7%)     | <b>p=0.047</b>    |

**Legend:** Profile counts were determined by maximum posterior probability or estimated according to each patient's probability of membership in each profile. Mortality counts were compared by Pearson chi-squared test when profiles were assigned by maximum posterior probability or by fitted regression estimates when profiles were estimated.

**Table E11) MMP Measurements in Latent Profile 1 vs 2 (Derivation Cohort)**

|                               | <b>Latent Profile 1<br/>(n=41)</b> | <b>Latent Profile 2<br/>(n=85)</b> | <b>Significance</b> |
|-------------------------------|------------------------------------|------------------------------------|---------------------|
| <b>MMP-1</b> *                | 2450.1 (928.1-6995.0)              | 955.1 (631.1-1592.3)               | <b>p=0.002</b>      |
| <b>MMP-2</b>                  | 751.5 (582.6-889.9)                | 409.4 (311.7-561.8)                | <b>p&lt;0.001</b>   |
| <b>MMP-3</b> *                | 13.5 (6.7-38.0)                    | 2.6 (1.7-4.0)                      | <b>p&lt;0.001</b>   |
| <b>MMP-7</b> *                | 1280.5 (747.5-4382.2)              | 405.1 (183.0-791.9)                | <b>p&lt;0.001</b>   |
| <b>MMP-8</b> *                | 56.1 (22.8-130.6)                  | 19.7 (8.6-40.7)                    | <b>p&lt;0.001</b>   |
| <b>MMP-9</b> *                | 64.0 (47.0-120.0)                  | 140.5 (64.0-308.0)                 | <b>p=0.007</b>      |
| <b>MMP-9 (active)</b>         | 152.6 (99.8-334.0)                 | 269.0 (126.1-551.0)                | <b>p=0.032</b>      |
| <b>TIMP-1</b> *               | 931.0 (702.0-1355.0)               | 197.5 (122.0-336.0)                | <b>p&lt;0.001</b>   |
| <b>TIMP-2</b> *               | 105.9 (83.3-124.6)                 | 70.4 (54.9-83.5)                   | <b>p&lt;0.001</b>   |
| <b>MMP-9/ TIMP-1</b>          | 0.08 (0.06-0.15)                   | 0.75 (0.41-1.66)                   | <b>p&lt;0.001</b>   |
| <b>MMP-9 (active)/ TIMP-1</b> | 0.14 (0.10-0.31)                   | 1.37 (0.68-2.98)                   | <b>p&lt;0.001</b>   |

**Legend:** Biomarker distributions are described with median and interquartile ranges and compared across Profiles 1 vs. 2 with the non-parametric Wilcoxon rank sum test. \* Indicates MMP biomarkers used to establish latent class membership.

**Table E12) Multiple Linear Regression Associating Probability of Latent Profile 1 with MMP Pathway Measurements in the Derivation Cohort**

| <b>Model</b>                                      | <b>Adjusted R<sup>2</sup></b> | <b>Root MSE</b> | <b>k-1 Likelihood Ratio Test</b> |
|---------------------------------------------------|-------------------------------|-----------------|----------------------------------|
| <b>TIMP-1</b>                                     | 0.654                         | 0.272           | n/a                              |
| <b>TIMP-1, MMP-3</b>                              | 0.689                         | 0.258           | <b>p&lt;0.001</b>                |
| <b>TIMP-1, MMP-3, TIMP-2</b>                      | 0.737                         | 0.234           | <b>p&lt;0.001</b>                |
| <b>TIMP-1, MMP-3, TIMP-2, MMP-7</b>               | 0.767                         | 0.220           | <b>p&lt;0.001</b>                |
| <b>TIMP-1, MMP-3, TIMP-2, MMP-7, MMP-9</b>        | 0.816                         | 0.196           | <b>p&lt;0.001</b>                |
| <b>TIMP-1, MMP-3, TIMP-2, MMP-7, MMP-9, MMP-1</b> | 0.817                         | 0.195           | p=0.217                          |

**Legend:** Order of variables for subsequent addition into linear regression was selected by Least Angle Regression in order to maximize fit while minimizing  $C_p$  (Efron, Hastie, Johnstone and Tibshirani, The Annals of Statistics, 2004).

## **SUPPLEMENTAL DATA 3**

### **Validation of Latent Classes**

**PEDIATRIC ARDS VALIDATION COHORT (n=109)**

**Table E13a) MMP Latent Profile Analysis in Pediatric ARDS Validation Cohort**

| <b>Models</b>     | <b>AIC</b> | <b>BIC</b> | <b>ABIC</b> | <b>k-1 LMR</b> | <b>Entropy</b> | <b>Profile Size</b> |
|-------------------|------------|------------|-------------|----------------|----------------|---------------------|
| <b>2 profiles</b> | 740.193    | 807.477    | 728.480     | <b>p=0.003</b> | 0.835          | n=42,67             |
| <b>3 profiles</b> | 692.606    | 784.111    | 676.676     | p=0.367        | 0.825          | n=22,35,52          |
| <b>4 profiles</b> | 670.367    | 786.095    | 650.221     | p=0.507        | 0.843          | n=12,21,35,41       |

**Legend:** Akaike, Bayesian, and sample-size adjusted Bayesian Information Criteria (AIC, BIC, ABIC, respectively) are listed for 2, 3, and 4 profile models. Each model was compared to the model with 1 fewer latent profile (k-1) using the Lo-Mendell-Rubin (LMR) Adjusted Likelihood Ratio Test. Profile Size refers to sample size of each Latent Profile according to most likely assignment based on posterior probabilities. Although a 3 class model had a smaller BIC relative to the 2 profile model, it was not significantly different by LMR test (p=0.367) and had lower entropy; it was therefore was determined to be overfit and a 2 profile model was selected.

**Table E13b) Average Latent Class Probabilities for Most Likely Latent Class Membership (Row) by Latent Class (Column) in the Validation Cohort**

|                                                           | <b>Probability of Profile 1</b> | <b>Probability of Profile 2</b> |
|-----------------------------------------------------------|---------------------------------|---------------------------------|
| <b>Patients Most Likely to belong to Profile 1 (n=32)</b> | 97.0%                           | 3.0%                            |
| <b>Patients Most Likely to belong to Profile 2 (n=77)</b> | 5.9%                            | 94.1%                           |

**Legend:** Patients were assigned to latent profiles based on the maximum posterior probability for profile 1 vs. 2 (rows). The mean probability of being in profile 1 vs. profile 2 is listed for patients whose maximum posterior probability grouped them in profile 1 and again for patients whose maximum posterior probability grouped them in profile 2. These data show that misclassification in the 2-profile model was low.

**Table E13c) Incidence and Mortality of Latent Profile 1 vs. 2 in the Validation Cohort**

|                               | <b>Profile 1</b> | <b>Profile 2</b> | <b>Comparison</b> |
|-------------------------------|------------------|------------------|-------------------|
| <b>Number of Patients</b>     |                  |                  |                   |
| Maximum Posterior Probability | 42 (38.5%)       | 67 (61.5%)       | n/a               |
| Estimated Profile Counts      | 41.6 (38.1%)     | 67.4 (61.9%)     | n/a               |
| <b>Mortality</b>              |                  |                  |                   |
| Maximum Posterior Probability | 13 (31.0%)       | 7 (10.5%)        | <b>p=0.007</b>    |
| Estimated Profile Counts      | 14.4 (34.5%)     | 5.4 ( 8.0%)      | <b>p&lt;0.001</b> |

**Legend:** Profile counts were determined by maximum posterior probability or estimated according to each patient’s probability of membership in each profile. Mortality counts were compared by Pearson chi-squared test when profiles were assigned by maximum posterior probability or by fitted regression estimates when profiles were estimated.

**Table E14) MMP Measurements in Latent Profile 1 vs 2 (Validation Cohort)**

|                               | <b>Latent Profile 1<br/>(n=42)</b> | <b>Latent Profile 2<br/>(n=67)</b> | <b>Significance</b> |
|-------------------------------|------------------------------------|------------------------------------|---------------------|
| <b>MMP-1</b> *                | 2455.7 (1032.4-4799.7)             | 844.0 (492.7-1965.0)               | <b>p&lt;0.001</b>   |
| <b>MMP-2</b>                  | 577.1 (484.2-795.8)                | 458.5 (348.0-711.2)                | <b>p=0.014</b>      |
| <b>MMP-3</b> *                | 9.4 (3.8-20.0)                     | 2.6 (1.5-5.0)                      | <b>p&lt;0.001</b>   |
| <b>MMP-7</b> *                | 972.8 (366.4-1799.4)               | 179.1 (136.5-319.6)                | <b>p&lt;0.001</b>   |
| <b>MMP-8</b> *                | 56.4 (18.8-132.4)                  | 21.5 (13.0-40.6)                   | <b>p=0.005</b>      |
| <b>MMP-9</b> *                | 80.5 (54.0-151.0)                  | 145.0 (73.0-324.0)                 | <b>p=0.005</b>      |
| <b>MMP-9 (active)</b>         | 133.4 (109.7-336.8)                | 235.1 (141.6-516.9)                | p=0.072             |
| <b>TIMP-1</b> *               | 609.5 (396.0-1080.0)               | 189.0 (127.0-275.0)                | <b>p&lt;0.001</b>   |
| <b>TIMP-2</b> *               | 99.6 (80.9-118.0)                  | 77.1 (60.1-89.8)                   | <b>p&lt;0.001</b>   |
| <b>MMP-9/ TIMP-1</b>          | 0.13 (0.07-0.18)                   | 0.67 (0.35-1.54)                   | <b>p&lt;0.001</b>   |
| <b>MMP-9 (active)/ TIMP-1</b> | 0.26 (0.13-0.54)                   | 1.08 (0.70-2.48)                   | <b>p&lt;0.001</b>   |

**Legend:** Biomarker distributions are described with median and interquartile ranges and compared across Profiles 1 vs. 2 with the non-parametric Wilcoxon rank sum test. \* Indicates MMP biomarkers used to establish latent class membership.



**Table E15) Latent Profile Assignments in the Validation Cohort**

|                                                       | <b>Latent Profile 1 by LPA</b> | <b>Latent Profile 2 by LPA</b> |
|-------------------------------------------------------|--------------------------------|--------------------------------|
| <b>Profile 1 by Regression from Derivation Cohort</b> | 28 (35.9%)                     | 1 (1.3%)                       |
| <b>Profile 2 by Regression from Derivation Cohort</b> | 2 (2.6%)                       | 47 (60.3%)                     |

**Legend:** n=78 of 109 validation cohort patients included (n=31 excluded due to inability to apply regression given missing MMP pathway measurements).

**Table E16) MMP Profiles are Associated with Elevated Inflammation, Endothelial Injury, and Impaired Oxygenation**

|                           | <b>Derivation Group</b> |                         |                   | <b>Validation Group</b> |                         |                   |
|---------------------------|-------------------------|-------------------------|-------------------|-------------------------|-------------------------|-------------------|
|                           | <b>Latent Profile 1</b> | <b>Latent Profile 2</b> | <b>Signif.</b>    | <b>Latent Profile 1</b> | <b>Latent Profile 2</b> | <b>Signif.</b>    |
| <b>Inflammation</b>       |                         |                         |                   |                         |                         |                   |
| IL-1RA                    | 777.5 (470-6270)        | 488 (190-823.5)         | <b>p=0.002</b>    | 793 (17-2550)           | 384 (0-711)             | <b>p=0.002</b>    |
| IL-6                      | 174 (50-1465)           | 53 (21-137)             | <b>p=0.004</b>    | 228.5 (75-1610)         | 39 (11-141)             | <b>p&lt;0.001</b> |
| IL-8                      | 300.5 (160.5-918.5)     | 87 (40.5-176)           | <b>p&lt;0.001</b> | 244 (158-584)           | 63 (34-114)             | <b>p&lt;0.001</b> |
| IL-10                     | 74 (38-328)             | 22 (8.6-48)             | <b>p&lt;0.001</b> | 51.5 (35-88)            | 16 (9.6-49)             | <b>p&lt;0.001</b> |
| IL-18                     | 1180 (643.5-1925)       | 345 (192.5-750)         | <b>p&lt;0.001</b> | 599 (334-1960)          | 352 (189-729)           | <b>p&lt;0.001</b> |
| MIP-1 $\alpha$            | 60 (36-96)              | 29 (0-35)               | <b>p&lt;0.001</b> | 38.5 (0-60)             | 0 (0-0)                 | <b>p&lt;0.001</b> |
| MIP-1 $\beta$             | 648 (436.5-1130)        | 353.5 (225-454)         | <b>p&lt;0.001</b> | 510.5 (374-870)         | 315 (206-442)           | <b>p&lt;0.001</b> |
| TNF- $\alpha$             | 4.1 (2.7-9.5)           | 1.7 (1.3-2.5)           | <b>p&lt;0.001</b> | 4.2 (2.6-7.2)           | 1.6 (1.2-2.5)           | <b>p&lt;0.001</b> |
| TNF-R2                    | 94 (41.5-148.5)         | 18 (12.5-33)            | <b>p&lt;0.001</b> | 37.5 (20-78)            | 15 (10-21)              | <b>p&lt;0.001</b> |
| <b>Endothelial Injury</b> |                         |                         |                   |                         |                         |                   |
| Ang-2                     | 24.6 (10.3-43.0)        | 5.7 (3.2-9.2)           | <b>p&lt;0.001</b> | 12.8 (7.7-24.2)         | 4.8 (2.8-9.4)           | <b>p&lt;0.001</b> |
| vWF                       | 265 (199-334)           | 233 (136-283)           | <b>p=0.036</b>    | 243.5 (204-344)         | 200 (162-286)           | <b>p=0.005</b>    |
| sTM                       | 149.0 (86.1-247.0)      | 69.2 (46.2-99.8)        | <b>p&lt;0.001</b> | 115.3 (77.0-167.7)      | 83.4 (47.6-117.2)       | <b>p=0.001</b>    |
| <b>Oxygenation</b>        |                         |                         |                   |                         |                         |                   |
| PaO2/FiO2 Ratio           | 108.6 (79-240)          | 177.9 (92.1-228.3)      | p=0.105           | 126 (82.5-172)          | 123.5 (75-205.7)        | p=0.989           |
| Oxygenation Index         | 12.4 (6.8-22.1)         | 7.9 (6.0-15.6)          | p=0.086           | 12.2 (7.4-22.7)         | 9.3 (5.4-17.1)          | <b>p=0.036</b>    |

**Legend:** Biomarker distributions are described with median and interquartile ranges and compared across Profiles 1 vs. 2 with the non-parametric Wilcoxon rank sum test.

**Table E17) Receiver Operating Characteristics for Clinical Outcomes**

|                          | <b>Mortality</b> |           | <b>Mortality or Severe Morbidity</b> |           |
|--------------------------|------------------|-----------|--------------------------------------|-----------|
| <b>P/F</b>               | 0.65             | 0.56-0.74 | 0.66                                 | 0.58-0.73 |
| <b>OI</b>                | 0.67             | 0.58-0.76 | 0.69                                 | 0.62-0.77 |
| <b>MMP Profile</b>       | 0.63             | 0.55-0.71 | 0.69                                 | 0.62-0.75 |
| <b>P/F + MMP Profile</b> | 0.72             | 0.62-0.81 | 0.75                                 | 0.68-0.82 |
| <b>OI + MMP Profile</b>  | 0.72             | 0.63-0.82 | 0.77                                 | 0.70-0.84 |

**Legend:** Areas under the receiver operating characteristics (AUROC) are shown with 95% confidence intervals. P/F n=218, OI n=198, MMP n=235, P/F + MMP n=218, OI + MMP n=198. Comparisons of models (ie: P/F vs. P/F + MMP Profile) are listed in the primary text and used only the subset of observations present in both models.
